# Supplementary material
Source: PubMed Central journal article supplement (PMC2323266)
Supplement: emboj200843s1.pdf [file emboj200843s1.pdf]

## SUPPLEMENTAL DATA

### **Reporter plasmid construction**

The LacZ $\beta$  reporter plasmid pBS2415 was constructed by inserting the 3.0kb BamHI-XbaI fragment from pIND/Hygro/lacZ plasmid (Invitrogen) in BamHI-XbaI sites of the pTRE2 plasmid (Clontech). The LacZD1 reporter plasmid pBS2416 was constructed by inserting the 3.0kb BamHI-XhoI fragment from pIND/Hygro/lacZ plasmid (Invitrogen) together with a HindIII-XbaI fragment isolated from a cDNA encoding human cyclin D1 (kindly provided by L. Corbo) and PCR fragments amplified from the human cyclin D1 cDNA with oligonucleotides OBS420, OBS421, OBS422, OBS423 in BamHI-BstAPI sites of the pTRE2 plasmid (Clontech). The resulting construction consists of the LacZ ORF followed by the 3'UTR of cyclin D1 transcript from the stop codon to the polyadenylation site. The  $\beta$ globin reporter pTet- $\beta$ globin (Couttet and Grange, 2004) was kindly provided by T. Grange.

**Table S I: sequences of DNA and RNA oligonucleotides**

| Name    | Sequence                                            |
|---------|-----------------------------------------------------|
| OBS420  | GCCGCTCGAGTCTGAGGGCGCCAGGCAGGCGGG                   |
| OBS421  | AATGAAGCTTTCCCTTCTGGTATG                            |
| OBS422  | GCTCTAGAAATAAACTGGTAAAACCCCAATAGTGTGTGGGAATTTTTTGTG |
| OBS423  | GGCAGCCAGCATATGGCATATGTTGCCAAA                      |
| OBS633  | CCGCTCGAGACCATGAGCCACGGGAAGGGAA                     |
| OBS634  | CGGGATCCGGACATGTTGCTGGAGACTGCCATCAC                 |
| OBS682  | ATTATGTTGCTATGGCCACCGCCTTCCAGGCGTTG                 |
| OBS683  | CAACGCCTGGAAACGCGGTGGCCATAGCAACATAAT                |
| OBS800  | CCGCTCGAGTATGCCAGCAGCAACCGTAGATC                    |
| OBS801  | TTGCCCATGGCTGACTGCTTGCTGGCTTCCT                     |
| OBS2138 | TTAATACGACTCACTATAGG                                |
| OBS2140 | CAACGACCACTTTGTCAAGC                                |
| OBS2141 | CTAAAAGCCACCCCACTTCT                                |
| OBS2313 | TTAATACGACTCACTATAGGTTT                             |
| OBS2818 | GCTGATATCGTAAGTCTGCAGGCGGTTGAAACGGAAC               |
| OBS2819 | GTTCCGTTTCAACCGCCTGCAGACTTACGATATCAGC               |
| T7-rev  | CCUAUAGUGAGUCGUAUUA                                 |

## Supplementary Figure 1

|            |                                                    |
|------------|----------------------------------------------------|
| wtBTG2     | MSHGKGTDMLPEIAAAVGFLSSLLRTRGCVSEQRLKVFSGALQEALTEHY |
| mtBTG2-66+ | MSHGKGTDMLPEIAAAVGFLSSLLRTRGCVSEQRLKVFSGALQEALTEHY |
| wtBTG2     | KHHWFPEKPSKSGSYR-----CIRINHKMDPIISRVASQIGLSQPQLHQL |
| mtBTG2-66+ | KHHWFPEKPSKSGSYRCCGRSCIRINHKMDPIISRVASQIGLSQPQLHQL |
| wtBTG2     | LPSELTLWVDPYEVSYRIGEDGSICVLYEEAPLAASCGLLTCKNQVLLGR |
| mtBTG2-66+ | LPSELTLWVDPYEVSYRIGEDGSICVLYEEAPLAASCGLLTCKNQVLLGR |
| wtBTG2     | SSPSKNYVMAVSS                                      |
| mtBTG2-66+ | SSPSKNYVMAVSS                                      |

Sequence of the wild-type and mtBTG2-66+ proteins. The sequences presented do not contain the HA tag or two-hybrid domains fused for specific experiments. The conserved BoxA and BoxB motifs characteristic of BTG/Tob proteins are shown in red and blue respectively.
